# Supplementary material for: A functional variant alters binding of activating protein 1 regulating expression of FGF7 gene associated with chronic obstructive pulmonary disease
Source: Springer Nature journal article supplement (doi:10.1186/s12881-019-0761-7), 2019-02-18
Supplement: MOESM2 [file 16488748]

1 **Supplementary Table 2 Twelve SNPs in strong LD with the tag SNP rs10519225**

| Chr       | Pos (hg38)      | LD (r <sup>2</sup> ) | LD (D')     | Variant           | Ref      | Alt      | AFR freq    | AMR freq    | ASN freq    | EUR freq   | Enhancer histone marks | DNase            | Proteins bound          | Motifs changed           |
|-----------|-----------------|----------------------|-------------|-------------------|----------|----------|-------------|-------------|-------------|------------|------------------------|------------------|-------------------------|--------------------------|
| 15        | 49383111        | 0.97                 | 0.98        | rs12901929        | T        | C        | 0.05        | 0.25        | 0.16        | 0.38       | 6 tissues              | CRVX             |                         | lrf,NF-AT,Pbx-1          |
| <b>15</b> | <b>49383505</b> | <b>0.9</b>           | <b>0.98</b> | <b>rs12905203</b> | <b>A</b> | <b>G</b> | <b>0.11</b> | <b>0.27</b> | <b>0.16</b> | <b>0.4</b> | <b>6 tissues</b>       | <b>8 tissues</b> | <b>5 bound proteins</b> | <b>19 altered motifs</b> |
| 15        | 49407114        | 0.99                 | 1           | rs36023246        | A        | G        | 0.05        | 0.25        | 0.16        | 0.38       |                        | LIV              |                         | CAC-binding-protein      |
| 15        | 49412544        | 0.88                 | 1           | rs12591300        | G        | A        | 0.05        | 0.25        | 0.16        | 0.35       |                        | MUS              |                         | Ets,GR                   |
| 15        | 49427756        | 0.99                 | 1           | rs10519224        | A        | C        | 0.05        | 0.25        | 0.16        | 0.38       |                        | HRT,MUS          |                         | Foxc1                    |
| 15        | 49428581        | 1                    | 1           | rs10519225        | G        | A        | 0.05        | 0.25        | 0.16        | 0.38       |                        | 8 tissues        |                         | Arid5b,Pou2f2            |
| 15        | 49431258        | 0.99                 | 1           | rs11855798        | G        | C        | 0.05        | 0.25        | 0.16        | 0.38       | 4 tissues              |                  |                         | 7 altered motifs         |
| 15        | 49442915        | 0.93                 | -0.97       | rs9920722         | C        | T        | 0.56        | 0.71        | 0.79        | 0.62       | 5 tissues              |                  |                         | 5 altered motifs         |
| 15        | 49443468        | 0.86                 | 0.99        | rs12916839        | C        | T        | 0.05        | 0.25        | 0.16        | 0.35       | STRM                   |                  |                         | Cdx,Gfi1                 |
| 15        | 49446345        | 0.97                 | 0.99        | rs17478694        | C        | G        | 0.05        | 0.25        | 0.16        | 0.37       | FAT, STRM, SKIN        |                  |                         | 5 altered motifs         |
| 15        | 49448107        | 0.97                 | 0.99        | rs17478785        | A        | C        | 0.05        | 0.25        | 0.16        | 0.37       | STRM, GI               |                  |                         | p300                     |
| 15        | 49450872        | 0.97                 | 0.99        | rs4389093         | A        | G        | 0.06        | 0.26        | 0.16        | 0.37       | 4 tissues              | OVRY             |                         |                          |

2 Chr., chromosome. Pos., chromosome position. Ref., reference allele. Alt., altered allele. **Freq., minor/alt allele frequencies.** The candidate functional

3 variant is in blue.

4

5
