# Supplementary material for: A functional variant alters binding of activating protein 1 regulating expression of FGF7 gene associated with chronic obstructive pulmonary disease
Source: Springer Nature journal article supplement (doi:10.1186/s12881-019-0761-7), 2019-02-18
Supplement: MOESM3 [file 16488748]

1 **Supplementary Table 3 The candidate functional variant lies on binding sites for multiple transcription factors.**

| Position Weight Matrix ID | Strand | Match on:                      |                                |
|---------------------------|--------|--------------------------------|--------------------------------|
|                           |        | Ref:                           | Alt:                           |
|                           |        | TATATACACTGGGAAACCAAAACATTTGTA | ATGACTCACTTTGTTGCAATATTTGTTTTA |
|                           |        | TATATACACTGGGAAACCAAAACATTTGTG | TGACTCACTTTGTTGCAATATTTGTTTTA  |
| AP-1_disc3                | -      |                                | DRTGASTCAY                     |
| AP-1_known3               | +      |                                | VTGACTHA                       |
| AP-1_known4               | +      |                                | MTGASTMAB                      |
| AP-2_disc1                | -      |                                | VTGASTCABB                     |
| BAF155_disc1              | -      |                                | GRTGASTCAS                     |
| BATF_disc1                | +      |                                | KNDVTGASTCA                    |
| BCL_disc2                 | +      |                                | MTGASTCAKY                     |
| Bach1                     | +      |                                | RBSATGACTCAYSNE                |
| Bach2                     | +      |                                | SRTGACKCAYS                    |
| Cdx                       | +      | NAYWRHHARAKHRTAWA              |                                |
| GATA_disc2                | -      |                                | SHVTGAVTCA                     |
| GR_disc2                  | -      |                                | VTGASTCABN                     |
| Irf_disc2                 | -      |                                | DHTGASTCAD                     |
| KAP1_disc1                | -      |                                | NDVTGASTCA                     |
| Mef2_disc3                | +      |                                | AWGASTCAG                      |
| Myc_disc3                 | +      |                                | VTGASTCABB                     |
| PRDM1_disc2               | -      |                                | RTGASTCAYH                     |
| RXRA_disc3                | -      |                                | DTKASTMAHH                     |
| STAT_disc2                | +      |                                | VTGANTCAYN                     |
| TCF4_disc1                | +      |                                | VTGASTCABN                     |
| p300_disc1                | +      |                                | VTGASTCABN                     |

2 Ref. reference sequence, Alt., altered sequence.

3

4
