# Supplementary material for: A functional variant alters binding of activating protein 1 regulating expression of FGF7 gene associated with chronic obstructive pulmonary disease
Source: Springer Nature journal article supplement (doi:10.1186/s12881-019-0761-7), 2019-02-18
Supplement: MOESM4 [file 16488748]

1 Supplementary Table 4 List of primer sequences for quantitative PCR assays.

| <b>Name</b> | <b>Sequences</b>                  |
|-------------|-----------------------------------|
| GAPDH-F     | TGCACCACCAACTGCTTAGC              |
| GAPDH-R     | GGCATGGACTGTGGTCATGAG             |
| ChIP-F      | TAGACAAAATGCTATTATACCCTTAAGAG     |
| ChIP-R      | AATATAGGCATACCTCAGAGATATTGCA      |
| FGF7-F      | TCTTCTGTGGAACACAGTGGTACCTGAGGA    |
| FGF7-R      | TTGATTGCCACAATTCCAACCTGCCACTGTCCT |
| rs12905203  |                                   |
| probe1      | TGTATGACTCACTTTG                  |
| probe2      | CATTTGTGTGACTCACTT                |
| primer-F    | AATGCTATTATACCCTTAAGAGACTAC       |
| primer-R    | TAGGCATACCTCAGAGATATTGCAGGCT      |

2 F., Forward; R., Reverse; ChIP., chromatin immunoprecipitation.

3
